# Supplementary material for: Harvesting Environmental Microalgal Blooms for Remediation and Resource Recovery: A Laboratory Scale Investigation with Economic and Microbial Community Impact Assessment
Source: PubMed Central journal article supplement (PMC5872030; doi:10.3390/biology7010004), 2017-12-29
Supplement: biology-07-00004-s001.pdf [file biology-07-00004-s001.pdf]

## Supplementary Materials:

# Harvesting Environmental Microalgal Blooms for Remediation and Resource Recovery: A Laboratory Scale Investigation with Economic and Microbial Community Impact Assessment

Jagroop Pandhal, Wai L. Choon, Rahul V. Kapoore, David A. Russo, James Hanotu, I. A. Grant Wilson, Pratik Desai, Malcolm Bailey, William J. Zimmerman and Andrew S. Ferguson

**Table S1:** Complete composition of artificial freshwater growth medium.

| Component                                                                          | Concentration (mg/L) |
|------------------------------------------------------------------------------------|----------------------|
| NaHCO <sub>3</sub>                                                                 | 192                  |
| MnCl <sub>2</sub> ·4H <sub>2</sub> O                                               | 0.18                 |
| MgSO <sub>4</sub> ·7H <sub>2</sub> O                                               | 115                  |
| KCl                                                                                | 0.45                 |
| H <sub>2</sub> SeO <sub>3</sub>                                                    | 0.0016               |
| Ca(NO <sub>3</sub> ) <sub>2</sub> ·4H <sub>2</sub> O                               | 0.8                  |
| NH <sub>4</sub> Cl                                                                 | 1                    |
| KH <sub>2</sub> PO <sub>4</sub>                                                    | 0.025                |
| K <sub>2</sub> PO <sub>4</sub>                                                     | 0.025                |
| ZnSO <sub>4</sub> ·7H <sub>2</sub> O                                               | 0.022                |
| Na <sub>2</sub> EDTA·2H <sub>2</sub> O                                             | 0.5                  |
| H <sub>3</sub> BO <sub>3</sub>                                                     | 0.114                |
| FeSO <sub>4</sub> ·7H <sub>2</sub> O                                               | 0.05                 |
| CuSO <sub>4</sub> ·5H <sub>2</sub> O                                               | 0.016                |
| CoCl <sub>2</sub> ·6H <sub>2</sub> O                                               | 0.016                |
| (NH <sub>4</sub> ) <sub>6</sub> Mo <sub>7</sub> O <sub>24</sub> ·4H <sub>2</sub> O | 0.011                |

**Table S2:** A summary of FAME profiles between different microalgae species mostly focussing on recent studies. The studies were selected based on similar methodologies applied to sample processing steps, catalysts, GC columns and GC conditions. NB. Percentages will vary depending on the number of FAMES quantified in each experiment and only the major FAMES detected are shown for clarity in the comparison (see citation for more details of exact experimental procedures).

| Species                          | Author          | Year | C14:<br>0 | C16:<br>0 | C16:<br>1 | C16:<br>2 | C16:<br>3 | C17:<br>0 | C18:<br>0 | C18:<br>1 | C18:<br>2 | C18:<br>3 | C18:<br>4 | C20:<br>4 | C20:<br>5 | C22:<br>6 | Other<br>s |
|----------------------------------|-----------------|------|-----------|-----------|-----------|-----------|-----------|-----------|-----------|-----------|-----------|-----------|-----------|-----------|-----------|-----------|------------|
| <b>Published results</b>         |                 |      |           |           |           |           |           |           |           |           |           |           |           |           |           |           |            |
| <i>Chlamydomonas reinhardtii</i> | Talebi et al.   | 2013 | -         | 23.8      | 1.9       | -         | -         |           | 4.4       | 19.7      | 6.6       | 25.9      | -         | -         | -         | -         | 1.2        |
| <i>Chlorella pyrenoidosa</i>     | Montes et al.   | 2011 | 0.7       | 17.3      | 0.8       | 7.0       | 9.3       |           | 1.2       | 3.3       | 18.5      | 41.8      | -         | -         | -         | -         | -          |
| <i>Chlorella sp. 227</i>         | Sunja et al.    | 2010 | -         | 22.8      | -         | -         | -         |           | -         | 8.3       | 17.2      | 52.0      | -         | -         | -         | -         | -          |
| <i>Chlorella vulgaris</i>        | Laurens et al.  | 2012 | 0.2       | 18.3      | 12.3      | 6.1       | 0.3       |           | 1.2       | 18.9      | 15.1      | 24.0      | -         | 0.0       | 0.0       | -         | 0.9        |
| <i>Dunaliella primolecta</i>     | Lang et al.     | 2011 | 0.6       | 26.0      | 0.9       | -         | -         |           | 1.6       | 16.3      | 7.0       | 38.7      | 0.6       | -         | -         | -         | -          |
| <i>Dunaliella tertiolecta</i>    | Chen et al.     | 2011 | -         | 28.1      | 0.0       | 2.8       | 1.4       |           | 0.6       | 19.3      | 14.7      | 33.2      | -         | -         | -         | -         | -          |
| <i>Emiliana huxleyi</i>          | Lang et al.     | 2011 | 18.8      | 10.3      | -         | -         | -         |           | 10.8      | 42.2      | -         | -         | 8.7       | -         | -         | 9.2       | -          |
| <i>Heterosigma akashiwo</i>      | Lang et al.     | 2011 | 6.6       | 40.0      | 12.7      | 4.0       |           |           |           |           | 4.5       | 6.7       | 5.2       | 3.5       | 14.8      | -         | -          |
| <i>Isochrysis galbana</i>        | Fidalgo et al.  | 1998 | 14.4      | 12.6      | 19.4      | 0.5       | 0.2       |           | 0.4       | 3.1       | 0.7       | 1.6       | 15.2      | -         | 22.2      | 7.9       | 0.3        |
| <i>Nannochloris sp.</i>          | Lang et al.     | 2011 | 13.3      | 17.8      | -         | -         | -         |           |           | 23.9      | 10.8      | 28.2      | 6.1       | -         | -         | -         | -          |
| <i>Nannochloropsis oculata</i>   | Koberg et al.   | 2011 | 6.6       | 42.8      | 27.3      | -         | -         | 0.4       | 1.0       | 9.1       | 1.3       | 0.4       | -         | -         | 4.9       | -         | 3.0        |
| <i>Nannochloropsis oculata</i>   | Converti et al. | 2009 | -         | 62.0      | -         | -         | -         |           | 11.0      | 5.0       | 8.0       | 15.0      | -         | -         | -         | -         | -          |
| <i>Nannochloropsis</i>           | Wagenen         | 2012 | 7.0       | 19.0      | 30.0      | -         | -         |           | -         | 8.0       | -         | -         | -         | 6.0       | 26.0      | -         | -          |

|                                  |                |      |      |      |      |     |      |      |      |      |      |      |      |      |      |     |      |
|----------------------------------|----------------|------|------|------|------|-----|------|------|------|------|------|------|------|------|------|-----|------|
| <i>Salina</i>                    | at al.         |      |      |      |      |     |      |      |      |      |      |      |      |      |      |     |      |
| <i>Parietochloris incisa</i>     | Lang et al.    | 2011 | 0.0  | 19.8 | -    | 5.2 |      | 18.2 | 10.2 | 14.3 | 14.3 | -    | 14.0 | 4.3  | -    | -   |      |
| <i>Pavlova lutheri</i>           | Lang et al.    | 2011 | 10.1 | 11.1 | 26.3 | -   | -    |      | 5.2  | 0.6  | 0.5  | 9.1  | 0.3  | 18.0 | 9.7  | -   |      |
| <i>Phaeodactylum tricornutum</i> | Lang et al.    | 2011 | 6.7  | 14.7 | 43.6 | 2.0 | -    | -    | 15.8 | 0.5  | 0.4  | 1.1  | -    | 14.4 | 0.7  | -   |      |
| <i>Scenedesmus obliquus</i>      | Breuer et al.  | 2013 | 2.0  | 27.0 | 45.0 | -   | 1.0  | 2.0  | 3.0  | 1.0  | <1   | <1   | 1.0  | 14.0 | -    | 2.0 |      |
| <i>Scenedesmus sp.</i>           | Talebi et al.  | 2013 | -    | 15.6 | 4.1  | -   | -    | 3.0  | 15.2 | 7.0  | 23.0 | -    | -    | -    | -    | 7.5 |      |
| <i>Schizochytrium limacinum</i>  | Johnson et al. | 2009 | 5.3  | 56.5 | -    | -   | -    | -    | -    | -    | -    | -    | -    | -    | 29.7 | 5.2 |      |
| <i>Thalassiosira weissflogii</i> | Borges et al.  | 2011 | 6.8  | 17.2 | 24.3 | -   | 18.1 | 2.5  | 10.0 | -    | -    | -    | -    | 17.3 | 1.6  | 3.7 |      |
| <i>Thalassiosira weissflogii</i> | Lang et al.    | 2011 | 8.8  | 36.6 | 40.5 | -   | -    | -    | 14.0 |      | -    | -    | -    | -    | -    | -   |      |
| <i>Wild algae</i>                | Krohn et al.   | 2011 | -    | 47.1 | -    | -   | -    | 7.0  | -    | -    | -    | -    | -    | -    | -    | -   |      |
| <b>This study</b>                |                |      |      |      |      |     |      |      |      |      |      |      |      |      |      |     |      |
| NBAS                             | Pandhal et al. | 2015 | 9.8  | 28.1 | 1.6  | -   | -    | 2.9  | 5.0  | 8.9  | 12.2 | 31.4 | -    | -    | -    | -   | -    |
| SBAS                             | Pandhal et al. | 2015 | 7.2  | 53.7 | 4.4  | -   | -    | 2.5  |      | 4.0  | 21.5 | 0.2  | -    | -    | -    | 0.3 | 6.1  |
| ESTH                             | Pandhal et al. | 2015 | 8.2  | 30.3 | 0.6  | -   | -    | 0.9  | 9.2  | 2.9  | 7.6  | 16.4 | -    | -    | -    | 4.0 | 19.8 |
| NLT                              | Pandhal et al. | 2015 | 0.5  | 52.9 | 0.9  | -   | -    | 0.3  | 3.0  | 3.6  | 12.5 | 23.8 | -    | -    | -    | -   | 2.5  |
| WRP                              | Pandhal et al. | 2015 | 19.3 | 18.0 | 1.6  | -   | -    | 0.7  | 13.7 | 8.7  | 4.3  | 22.1 | -    | -    | -    | 0.3 | 11.1 |

**Table S3:** Chlorophyll a measurements during eFLOAT long-term experiment.

| Sample    | Time post harvest (days) | Chl a ( $\mu\text{g L}^{-1}$ ) | Average Chl a ( $\mu\text{g L}^{-1}$ ) | Variation ( $\mu\text{g L}^{-1}$ ) | Decrease % | Average % | Variation % |
|-----------|--------------------------|--------------------------------|----------------------------------------|------------------------------------|------------|-----------|-------------|
| WRP       | 0                        | 443.23                         |                                        |                                    |            |           |             |
| Blank 1   | 10                       | 404.37                         |                                        |                                    | 8.8        |           |             |
| Blank 2   | 10                       | 387.12                         | 395.7                                  | 12.2                               | 12.7       | 10.7      | 2.8         |
| Sub-max 1 | 10                       | 145.37                         |                                        |                                    | 67.2       |           |             |
| Sub-max 2 | 10                       | 162.91                         | 154.1                                  | 12.4                               | 63.2       | 65.2      | 2.8         |
| Max 1     | 10                       | 95.82                          |                                        |                                    | 78.4       |           |             |
| Max 2     | 10                       | 62.1                           | 79.0                                   | 23.8                               | 86.0       | 82.2      | 5.4         |

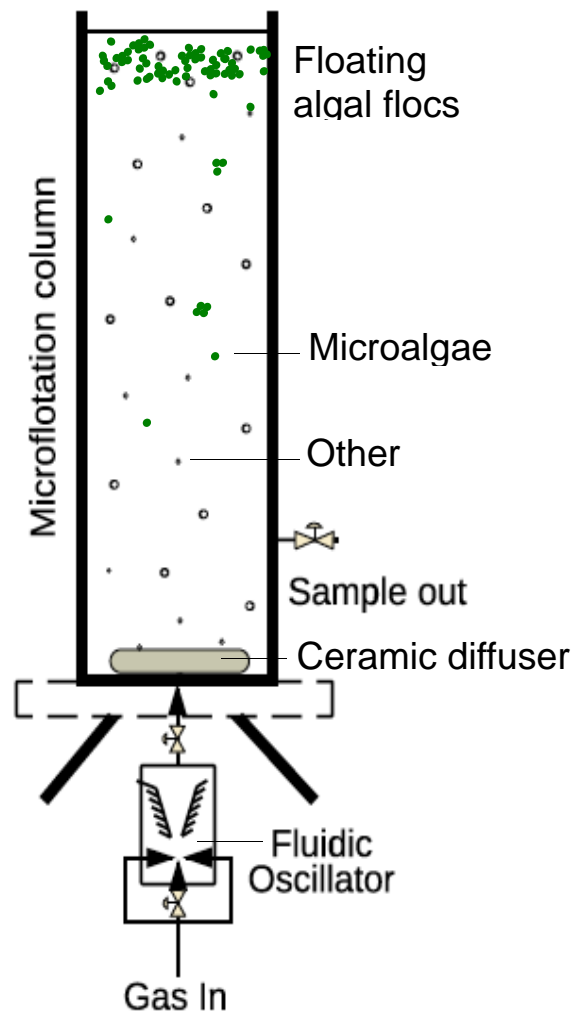

Figure S1: 1 litre eFLOAT Rig using during laboratory tests

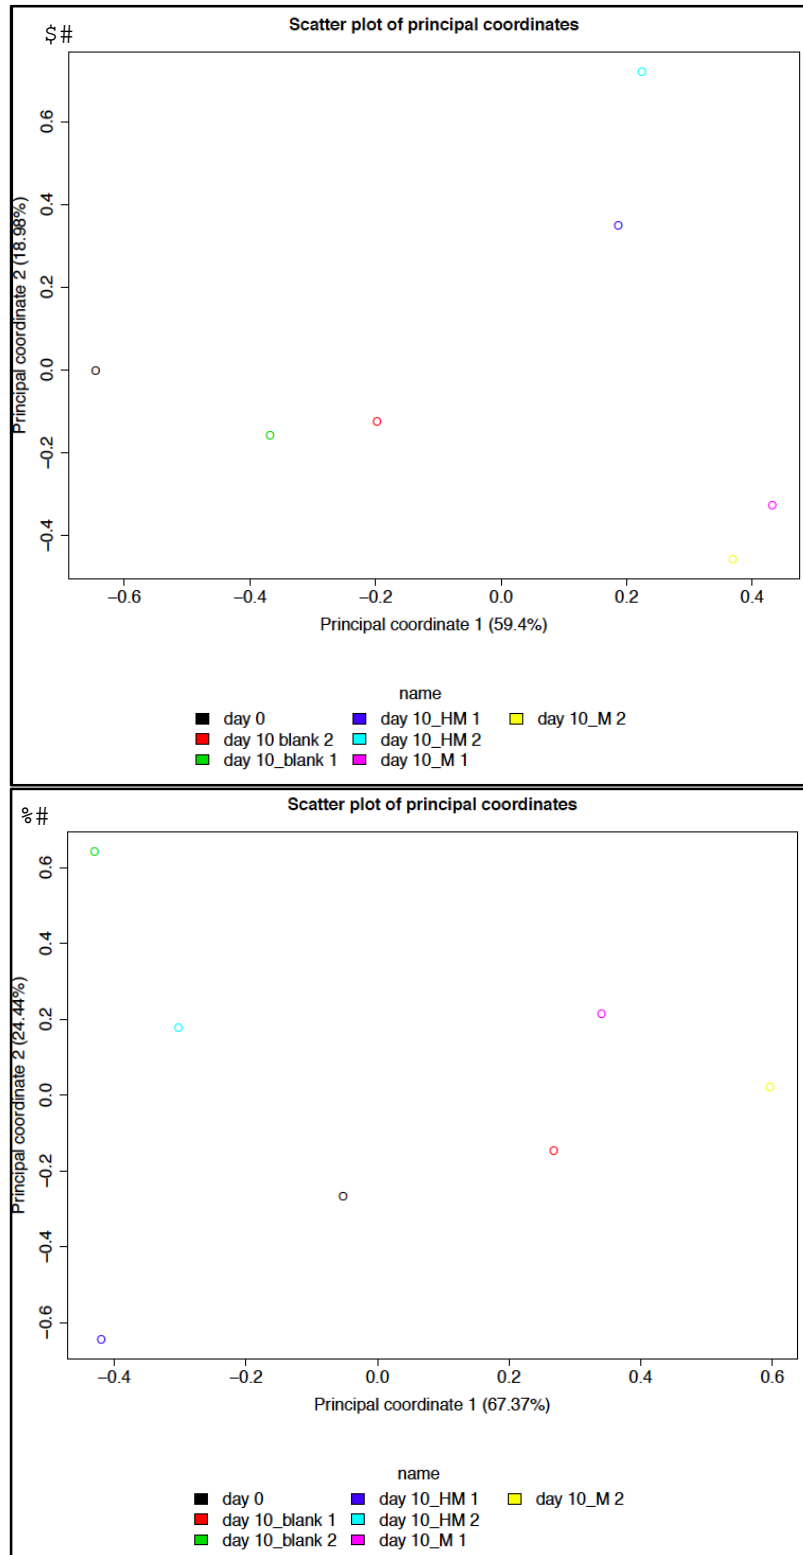

**Figure S2:** Scatter plot of coordinates (PCoA) to show relative abundance (%) variation between identified genus/class in biological replicate samples (A) Bacterial (16S rDNA sequencing) diversity (B) Eukaryotic (18S rDNA sequencing) diversity. HM: half max harvesting, M: max harvesting.

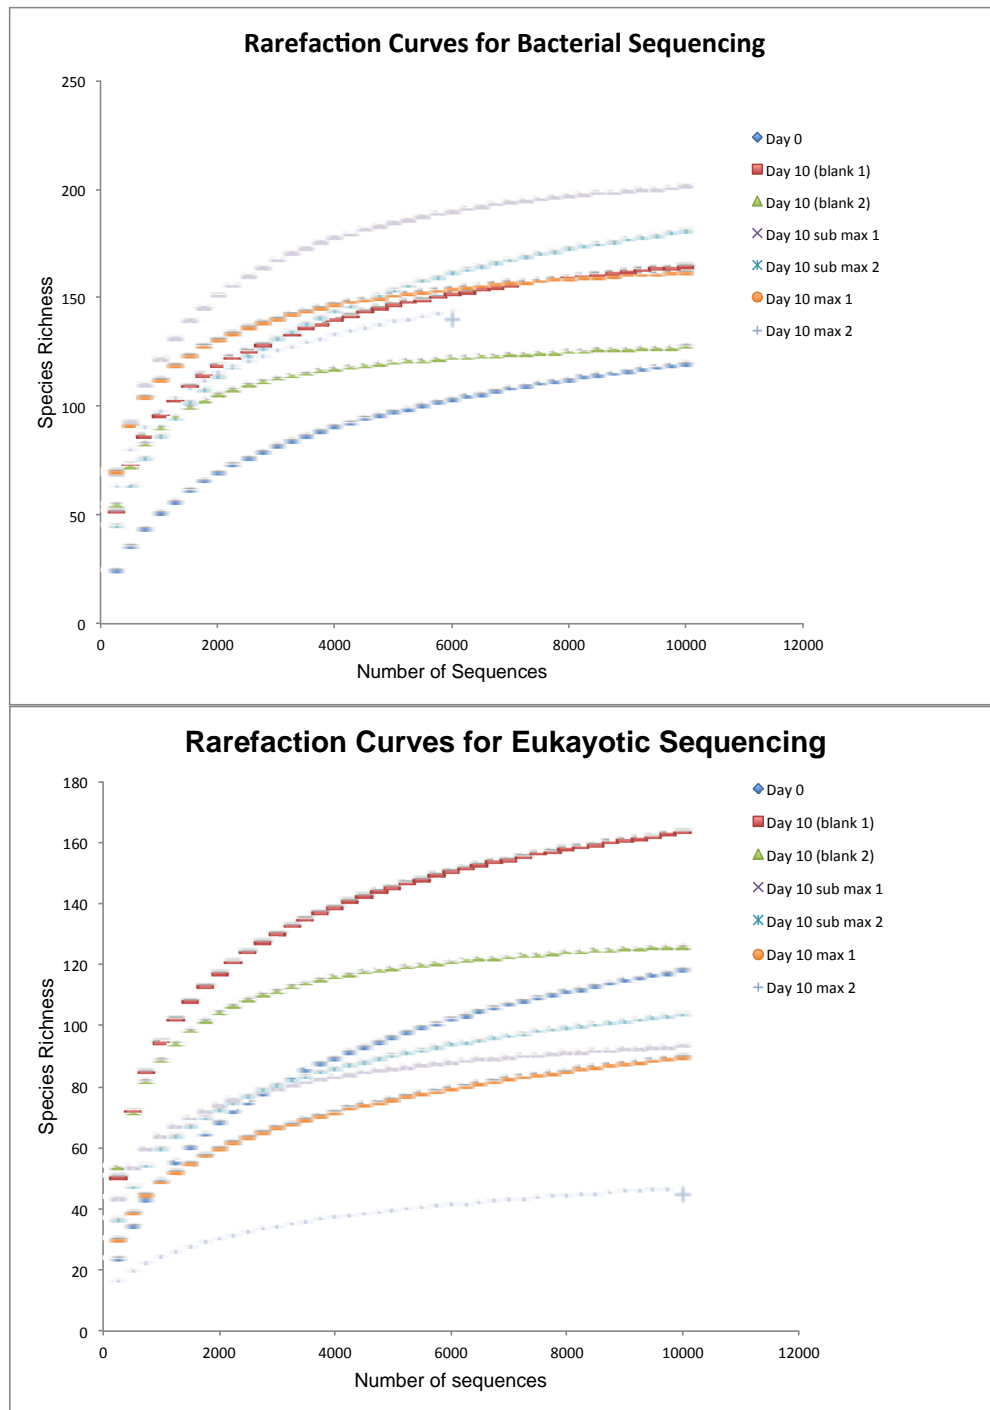

**Figure S3:** Rarefaction plots for bacterial primers (28F-519R) and eukaryotic primers (565-981).
